# Supplementary material for: Long Noncoding RNA LINC01234 Functions as a Competing Endogenous RNA to Regulate CBFB Expression by Sponging miR-204-5p in Gastric Cancer
Source: Oxford University Press journal article supplement (doi:10.1158/1078-0432.ccr-17-2376), 2018-01-31
Supplement: 10780432ccr172376-sup-187826_2_supp_4495818_p2b65r.xlsx [file 10780432ccr172376-sup-187826_2_supp_4495818_p2b65r.xlsx]

## Sheet: Patients clinical data
Number	Age	Gender	Differentiation	Size	Location	Invasion depth	Lymph node metastasis	Regional lymph nodes	Distant metastases	TNM stage	state	OS	PFS
1	<60	male	moderately	<5cm	Middle	T3	Positive	N2	Negative	III	death	19	15	The clinical data of each patient
2	≥60	male	moderately	≥5cm	Distal	T4	Positive	N2	Negative	III	death	29	23
3	≥60	female	Poorly	≥5cm	Distal	T4	Positive	N2	Negative	IV	death	7	5
4	<60	female	Well	<5cm	Distal	T2	Negative	N0	Negative	I	death	35	26
5	<60	male	Poorly	<5cm	Middle	T3	Negative	N0	Negative	II	survival	23	16
6	<60	female	Poorly	≥5cm	Distal	T3	Positive	N1	Negative	III	death	12	7
7	<60	male	moderately	<5cm	Proximal	T3	Positive	N2	Negative	III	death	42	32
8	<60	female	moderately	<5cm	Proximal	T1	Negative	N0	Negative	I	death	25	18
9	≥60	female	Poorly	<5cm	Distal	T4	Positive	N2	Negative	III	survival	15	10
10	≥60	female	Undifferentiated	≥5cm	Middle	T1	Negative	N0	Negative	I	survival	14	12
11	<60	male	moderately	≥5cm	Proximal	T4	Positive	N2	Positive	IV	death	21	21
12	<60	female	Well	<5cm	Middle	T2	Negative	N0	Negative	I	survival	15	15
13	≥60	female	Poorly	≥5cm	Distal	T4	Positive	N2	Positive	IV	survival	40	28
14	≥60	male	moderately	≥5cm	Proximal	T1	Negative	N0	Negative	I	survival	32	26
15	≥60	male	moderately	<5cm	Middle	T2	Positive	N1	Negative	II	survival	38	25
16	≥60	female	Well	<5cm	Distal	T2	Positive	N1	Negative	II	survival	32	28
17	≥60	male	Well	<5cm	Middle	T3	Negative	N0	Negative	II	survival	45	33
18	≥60	female	Poorly	<5cm	Distal	T1	Negative	N0	Negative	I	survival	39	27
19	≥60	female	Poorly	≥5cm	Distal	T1	Negative	N0	Negative	I	survival	26	19
20	≥60	female	Well	<5cm	Middle	T2	Negative	N0	Negative	I	survival	26	20
21	<60	female	Well	<5cm	Distal	T2	Negative	N0	Negative	I	survival	32	32
22	≥60	male	Undifferentiated	<5cm	Middle	T1	Negative	N0	Negative	I	survival	38	36
23	<60	male	Poorly	<5cm	Proximal	T1	Negative	N0	Negative	I	survival	23	20
24	≥60	male	Well	<5cm	Middle	T2	Positive	N1	Negative	II	survival	29	5
25	<60	female	Poorly	<5cm	Proximal	T3	Negative	N0	Negative	II	survival	28	28
26	<60	male	Poorly	<5cm	Distal	T4	Positive	N2	Negative	IV	death	9	4
27	<60	female	moderately	≥5cm	Distal	T3	Positive	N1	Negative	III	death	20	8
28	≥60	female	Poorly	≥5cm	Middle	T3	Positive	N1	Negative	III	death	22	15
29	≥60	female	Poorly	<5cm	Middle	T3	Positive	N2	Negative	III	death	28	22
30	<60	female	moderately	≥5cm	Distal	T3	Positive	N1	Negative	III	death	28	20
31	<60	male	Poorly	≥5cm	Distal	T4	Positive	N2	Positive	IV	death	6	5
32	≥60	male	Poorly	≥5cm	Distal	T4	Positive	N3	Negative	IV	death	12	8
33	≥60	male	moderately	≥5cm	Proximal	T3	Positive	N2	Negative	III	death	26	13
34	<60	female	Poorly	<5cm	Distal	T3	Positive	N2	Negative	III	survival	9	8
35	≥60	female	moderately	≥5cm	Proximal	T4	Positive	N3	Positive	IV	death	4	2
36	≥60	male	Poorly	≥5cm	Middle	T3	Positive	N2	Negative	III	death	18	16
37	≥60	female	moderately	≥5cm	Middle	T4	Positive	N2	Negative	IV	death	3	1
38	≥60	female	Undifferentiated	≥5cm	Distal	T4	Positive	N1	Positive	IV	death	12	10
39	≥60	female	Poorly	<5cm	Distal	T3	Positive	N1	Negative	III	death	10	6
40	<60	female	moderately	≥5cm	Middle	T3	Positive	N1	Negative	III	death	18	10
41	<60	male	moderately	≥5cm	Middle	T3	Negative	N0	Negative	II	survival	13	12
42	<60	male	Poorly	<5cm	Proximal	T1	Negative	N0	Negative	I	death	26	20
43	≥60	male	Undifferentiated	<5cm	Middle	T2	Positive	N2	Negative	II	survival	24	18
44	<60	female	Poorly	≥5cm	Distal	T3	Positive	N1	Negative	III	death	15	15
45	<60	male	moderately	<5cm	Proximal	T1	Negative	N0	Negative	I	survival	28	18
46	≥60	male	moderately	≥5cm	Distal	T2	Positive	N1	Negative	II	survival	5	5
47	≥60	male	Undifferentiated	<5cm	Middle	T4	Positive	N2	Negative	IV	survival	13	13
48	<60	male	Well	<5cm	Distal	T2	Positive	N1	Negative	II	death	20	16
49	≥60	male	Poorly	≥5cm	Distal	T4	Negative	N0	Negative	IV	death	16	10
50	<60	female	Poorly	<5cm	Middle	T1	Negative	N0	Negative	I	survival	30	22
