# Supplementary material for: Long Noncoding RNA LINC01234 Functions as a Competing Endogenous RNA to Regulate CBFB Expression by Sponging miR-204-5p in Gastric Cancer
Source: Oxford University Press journal article supplement (doi:10.1158/1078-0432.ccr-17-2376), 2018-01-31
Supplement: 10780432ccr172376-sup-187826_2_supp_4495820_p2b65r.xlsx [file 10780432ccr172376-sup-187826_2_supp_4495820_p2b65r.xlsx]

## Sheet: Sequence
qPCR primers
GAPDH F	GGGAGCCAAAAGGGTCAT
GAPDH R	GAGTCCTTCCACGATACCAA
LINC01234 F	CAGGGTACCCCAAGCAAGTC
LINC01234 R	GGGGTGAGAAGAGACAAGCG
CBFB F	CCGCGAGTGCGAGATTAAGTA
CBFB R	GTTCTGGAAGCGTGTCTGG
U6 F	CTCGCTTCGGCAGCACA
U6 R	AACGCTTCACGAATTTGCGT
LINC01234 Probe sequence
CTTATTGGCTTTATTATCAGGCAGGCTCTTCTATCACG
siRNA sequence
LINC01234 1#	GGCAUUAAGCCAGAUUGAGUCUUAA
	UUAAGACUCAAUCUGGCUUAAUGCC
LINC01234 2#	CCUCGGUCUCAGUUUCUCCAUUUAU
	AUAAAUGGAGAAACUGAGACCGAGG
LINC01234 3#	AGUUGAACCAAUCACUGUGCAUUUG
	CAAAUGCACAGUGAUUGGUUCAACU
miR-204-5p inhibitor	AGGCAUAGGAUGACAAAGGGAA
microRNA NC	CAGUACUUUUGUGUAGUACAA
miR-204-5p mimics	UUCCCUUUGUCAUCCUAUGCCU
	GCAUAGGAUGACAAAGGGAAUU
si-CBFB	GCCGCGAGUGUGAGAUUAATT
	UUAAUCUCACACUCGCGGCTT
sh-LINC01234	CACCGCCTCGGTCTCAGTTTCTCCATTTATCGAAATAAATGGAGAAACTGAGACCGAGG
	AAAACCTCGGTCTCAGTTTCTCCATTTATTTCGATAAATGGAGAAACTGAGACCGAGG
sh-CBFB	GCCGCGAGTGTGAGATTAA
oe-miR-204-5p	TTCCCTTTGTCATCCTATGCCT

## Sheet: Antibodys
Antibody	Company
GAPDH	Cell Signaling Technology
PARP	Cell Signaling Technology
cleaved PARP	Cell Signaling Technology
Caspase 3	Cell Signaling Technology
cleaved Caspase 3	Cell Signaling Technology
Cyclin D3	Cell Signaling Technology
CDK4	Cell Signaling Technology
Bax	Cell Signaling Technology
Bak	Cell Signaling Technology
Bcl-2	Proteintech
Bcl-xl	Proteintech
CBFB	Abcam
Ago2	Millipore
